# Supplementary material for: For which patient subgroups are there positive outcomes from a medication review? A systematic review
Source: PubMed Central journal article supplement — Pharm Pract (Granada). 2020 Oct 27;18(4):1976. doi: 10.18549/PharmPract.2020.4.1976 (PMC7672485; doi:10.18549/pharmpract.2020.4.1976), 2020-10-27

**Online Appendix 1. List of included studies**

|     |                                                                                                                                                                                                                                                                                                                                                                                                                                                                               |
|-----|-------------------------------------------------------------------------------------------------------------------------------------------------------------------------------------------------------------------------------------------------------------------------------------------------------------------------------------------------------------------------------------------------------------------------------------------------------------------------------|
| 1.  | Brummel, A.R.; Soliman, A.M.; Carlson, A.M.; de Oliveira, D.R. Optimal diabetes care outcomes following face-to-face medication therapy management services. <i>Population health management</i> <b>2013</b> , <i>16</i> , 28-34, doi:10.1089/pop.2012.0023.                                                                                                                                                                                                                  |
| 2.  | Ferries, E.; Dye, J.T.; Hall, B.; Ndehi, L.; Schwab, P.; Vaccaro, J. Comparison of Medication Therapy Management Services and Their Effects on Health Care Utilization and Medication Adherence. <i>Journal of managed care &amp; specialty pharmacy</i> <b>2019</b> , <i>25</i> , 688-695, doi:10.18553/jmcp.2019.25.6.688.                                                                                                                                                  |
| 3.  | Foppa, A.A.; Chemello, C.; Vargas-Pelaez, C.M.; Farias, M.R. Medication Therapy Management Service for Patients with Parkinson's Disease: A Before-and-After Study. <i>Neurology and therapy</i> <b>2016</b> , <i>5</i> , 85-99, doi:10.1007/s40120-016-0046-4.                                                                                                                                                                                                               |
| 4.  | Geurts, M.M.; Stewart, R.E.; Brouwers, J.R.; de Graeff, P.A.; de Gier, J.J. Implications of a clinical medication review and a pharmaceutical care plan of polypharmacy patients with a cardiovascular disorder. <i>Int J Clin Pharm</i> <b>2016</b> , <i>38</i> , 808-815, doi:10.1007/s11096-016-0281-x.                                                                                                                                                                    |
| 5.  | Henrichsmann, M.; Hempel, G. Impact of medication therapy management in patients with Parkinson's disease. <i>International journal of clinical pharmacy</i> <b>2016</b> , <i>38</i> , 54-60.                                                                                                                                                                                                                                                                                 |
| 6.  | Holland, R.; Lenaghan, E.; Harvey, I.; Smith, R.; Shepstone, L.; Lipp, A.; Christou, M.; Evans, D.; Hand, C. Does home based medication review keep older people out of hospital? The HOMER randomised controlled trial. <i>Bmj</i> <b>2005</b> , <i>330</i> , 293.                                                                                                                                                                                                           |
| 7.  | Isetts, B.J.; Schondelmeyer, S.W.; Artz, M.B.; Lenarz, L.A.; Heaton, A.H.; Wadd, W.B.; Brown, L.M.; Cipolle, R.J. Clinical and economic outcomes of medication therapy management services: the Minnesota experience. <i>Journal of the American Pharmacists Association : JAPhA</i> <b>2008</b> , <i>48</i> , 203-211; 203 p following 211, doi:10.1331/JAPhA.2008.07108.                                                                                                    |
| 8.  | Jodar-Sanchez, F.; Malet-Larrea, A.; Martin, J.J.; Garcia-Mochon, L.; Lopez Del Amo, M.P.; Martinez-Martinez, F.; Gastelurrutia-Garralda, M.A.; Garcia-Cardenas, V.; Sabater-Hernandez, D.; Saez-Benito, L., et al. Cost-utility analysis of a medication review with follow-up service for older adults with polypharmacy in community pharmacies in Spain: the conSIGUE program. <i>PharmacoEconomics</i> <b>2015</b> , <i>33</i> , 599-610, doi:10.1007/s40273-015-0270-2. |
| 9.  | Krass, I.; Taylor, S.J.; Smith, C.; Armour, C.L. Impact on medication use and adherence of Australian pharmacists' diabetes care services. <i>Journal of the American Pharmacists Association : JAPhA</i> <b>2005</b> , <i>45</i> , 33-40.                                                                                                                                                                                                                                    |
| 10. | Lapointe-Shaw, L.; Bell, C.; Austin, P.; Abrahamyan, L.; Ivers, N.M.; Li, P.; Pechlivanoglou, P.; Redelmeier, D.A.; Dolovich, L. Community pharmacy medication review, death and re-admission after hospital discharge: a propensity score-matched cohort study. <i>BMJ Qual Saf</i> <b>2019</b> , 10.1136/bmjqs-2019-009545, doi:10.1136/bmjqs-2019-009545.                                                                                                                  |
| 11. | Leendertse, A.; De Koning, G.; Goudswaard, A.; Belitser, S.; Verhoef, M.; De Gier, H.; Egberts, A.; Van den Bemt, P. Preventing hospital admissions by reviewing medication (PHARM) in primary care: an open controlled study in an elderly population. <i>Journal of clinical pharmacy and therapeutics</i> <b>2013</b> , <i>38</i> , 379-387.                                                                                                                               |
| 12. | Lenaghan, E.; Holland, R.; Brooks, A. Home-based medication review in a high risk elderly population in primary care--the POLYMED randomised controlled trial. <i>Age and ageing</i> <b>2007</b> , <i>36</i> , 292-297, doi:10.1093/ageing/afm036.                                                                                                                                                                                                                            |
| 13. | Messerli, M.; Blozik, E.; Vriends, N.; Hersberger, K.E. Impact of a community pharmacist-led medication review on medicines use in patients on polypharmacy--a prospective randomised controlled trial. <i>BMC health services research</i> <b>2016</b> , <i>16</i> , 145, doi:10.1186/s12913-016-1384-8.                                                                                                                                                                     |
| 14. | Messerli, M.; Vriends, N.; Hersberger, K.E. Humanistic outcomes and patient acceptance of the pharmacist-led medication review "Polymedication Check" in primary care in Switzerland: a prospective randomized controlled trial. <i>Patient Prefer Adherence</i> <b>2018</b> , <i>12</i> , 1071-1078, doi:10.2147/ppa.s160789.                                                                                                                                                |
| 15. | Moore, J.M.; Shartle, D.; Faudskar, L.; Matlin, O.S.; Brennan, T.A. Impact of a patient-centered pharmacy program and intervention in a high-risk group. <i>Journal of managed care pharmacy : JMCP</i> <b>2013</b> , <i>19</i> , 228-236, doi:10.18553/jmcp.2013.19.3.228.                                                                                                                                                                                                   |
| 16. | Mott, D.A.; Martin, B.; Breslow, R.; Michaels, B.; Kirchner, J.; Mahoney, J.; Margolis, A. Impact of a medication therapy management intervention targeting medications associated with falling: Results of a pilot study. <i>Journal of the American Pharmacists Association : JAPhA</i> <b>2016</b> , <i>56</i> , 22-28, doi:10.1016/j.japh.2015.11.001.                                                                                                                    |

|    |                                                                                                                                                                                                                                                                                                                                                                                                   |
|----|---------------------------------------------------------------------------------------------------------------------------------------------------------------------------------------------------------------------------------------------------------------------------------------------------------------------------------------------------------------------------------------------------|
| 17 | Planas, L.G.; Crosby, K.M.; Mitchell, K.D.; Farmer, K.C. Evaluation of a hypertension medication therapy management program in patients with diabetes. <i>Journal of the American Pharmacists Association : JAPhA</i> <b>2009</b> , <i>49</i> , 164-170, doi:10.1331/JAPhA.2009.08164.                                                                                                            |
| 18 | Roughead, E.E.; Barratt, J.D.; Ramsay, E.; Pratt, N.; Ryan, P.; Peck, R.; Killer, G.; Gilbert, A.L. The effectiveness of collaborative medicine reviews in delaying time to next hospitalization for patients with heart failure in the practice setting: results of a cohort study. <i>Circulation. Heart failure</i> <b>2009</b> , <i>2</i> , 424-428, doi:10.1161/circheartfailure.109.861013. |
| 19 | Roughead, E.E.; Barratt, J.D.; Ramsay, E.; Pratt, N.; Ryan, P.; Peck, R.; Killer, G.; Gilbert, A.L. Collaborative home medicines review delays time to next hospitalization for warfarin associated bleeding in Australian war veterans. <i>J Clin Pharm Ther</i> <b>2011</b> , <i>36</i> , 27-32, doi:10.1111/j.1365-2710.2009.01149.x.                                                          |
| 20 | Shaya, F.T.; Chirikov, V.V.; Rochester, C.; Zaghbab, R.W.; Kucharski, K.C. Impact of a comprehensive pharmacist medication-therapy management service. <i>Journal of medical economics</i> <b>2015</b> , <i>18</i> , 828-837, doi:10.3111/13696998.2015.1052463.                                                                                                                                  |
| 21 | Skinner, J.S.; Poe, B.; Hopper, R.; Boyer, A.; Wilkins, C.H. Assessing the effectiveness of pharmacist-directed medication therapy management in improving diabetes outcomes in patients with poorly controlled diabetes. <i>The Diabetes educator</i> <b>2015</b> , <i>41</i> , 459-465, doi:10.1177/0145721715587563.                                                                           |
| 22 | Sorensen, L.; Stokes, J.A.; Purdie, D.M.; Woodward, M.; Elliott, R.; Roberts, M.S. Medication reviews in the community: results of a randomized, controlled effectiveness trial. <i>British journal of clinical pharmacology</i> <b>2004</b> , <i>58</i> , 648-664, doi:10.1111/j.1365-2125.2004.02220.x.                                                                                         |
| 23 | Stafford, L.; Peterson, G.M.; Bereznicki, L.R.; Jackson, S.L.; van Tienen, E.C.; Angley, M.T.; Bajorek, B.V.; McLachlan, A.J.; Mullan, J.R.; Misan, G.M., et al. Clinical outcomes of a collaborative, home-based postdischarge warfarin management service. <i>Ann Pharmacother</i> <b>2011</b> , <i>45</i> , 325-334, doi:10.1345/aph.1P617.                                                    |
| 24 | Verdoorn, S.; Kwint, H.-F.; Blom, J.W.; Gussekloo, J.; Bouvy, M.L. Effects of a clinical medication review focused on personal goals, quality of life, and health problems in older persons with polypharmacy: A randomised controlled trial (DREAMeR-study). <i>PLoS medicine</i> <b>2019</b> , <i>16</i> , e1002798, doi:10.1371/journal.pmed.1002798.                                          |
| 25 | Verrue, C.; Mehuys, E.; Boussery, K.; Adriaens, E.; Remon, J.P.; Petrovic, M. A pharmacist-conducted medication review in nursing home residents: impact on the appropriateness of prescribing. <i>Acta clinica Belgica</i> <b>2012</b> , <i>67</i> , 423-429, doi:10.2143/acb.67.6.2062707.                                                                                                      |
| 26 | Wittayanukorn, S.; Westrick, S.C.; Hansen, R.A.; Billor, N.; Braxton-Lloyd, K.; Fox, B.I.; Garza, K.B. Evaluation of medication therapy management services for patients with cardiovascular disease in a self-insured employer health plan. <i>Journal of managed care pharmacy : JMCP</i> <b>2013</b> , <i>19</i> , 385-395, doi:10.18553/jmcp.2013.19.5.385.                                   |
| 27 | Wouters, H.; Scheper, J.; Koning, H.; Brouwer, C.; Twisk, J.W.; van der Meer, H.; Boersma, F.; Zuidema, S.U.; Taxis, K. Discontinuing Inappropriate Medication Use in Nursing Home Residents: A Cluster Randomized Controlled Trial. <i>Ann Intern Med</i> <b>2017</b> , <i>167</i> , 609-617, doi:10.7326/m16-2729.                                                                              |
| 28 | Zermansky, A.G.; Alldred, D.P.; Petty, D.R.; Raynor, D.K.; Freemantle, N.; Eastaugh, J.; Bowie, P. Clinical medication review by a pharmacist of elderly people living in care homes--randomised controlled trial. <i>Age and ageing</i> <b>2006</b> , <i>35</i> , 586-591, doi:10.1093/ageing/afl075.                                                                                            |

**Online Appendix 2. Characteristics of included studies**

| Author, year                                   | Country         | N (Control/ intervention) | Setting            | Health professional | Age group, residency                                                                     | Medication review model*                                         | Type of study                                       | Outcome measures                                                                                                                                               | Conclusions                                                                                                                                                                                                   |
|------------------------------------------------|-----------------|---------------------------|--------------------|---------------------|------------------------------------------------------------------------------------------|------------------------------------------------------------------|-----------------------------------------------------|----------------------------------------------------------------------------------------------------------------------------------------------------------------|---------------------------------------------------------------------------------------------------------------------------------------------------------------------------------------------------------------|
| <b>Risk medication</b>                         |                 |                           |                    |                     |                                                                                          |                                                                  |                                                     |                                                                                                                                                                |                                                                                                                                                                                                               |
| <i>Medication increasing the risk of falls</i> |                 |                           |                    |                     |                                                                                          |                                                                  |                                                     |                                                                                                                                                                |                                                                                                                                                                                                               |
| Mott, 2016 [26]                                | USA             | 42/39                     | Community pharmacy | Pharmacist          | Home-dwelling elderly with risk of falls                                                 | Medication Therapy Management with five follow-ups by phone (2a) | RCT                                                 | Clinical: Use of 'Fall Risk Increasing Drugs' (FRID) and number of falls                                                                                       | Clinical: Significant reduction in use of 'Fall Risk Increasing Drugs' (FRID) after six months (P<0.05). No difference in number of falls between groups.                                                     |
| <b>Heart medication</b>                        |                 |                           |                    |                     |                                                                                          |                                                                  |                                                     |                                                                                                                                                                |                                                                                                                                                                                                               |
| Geurts, 2016 [27]                              | The Netherlands | 264/248                   | Community pharmacy | Pharmacist          | Home-dwelling elderly using five or more medications and at least one for heart disorder | Medication review with interview and no follow-up (3)            | RCT                                                 | Clinical: Number of drug-related problems (DRP) and improvement of clinical and laboratory parameters                                                          | Clinical: Decrease in number of DRP identified for intervention group. No difference in clinical or laboratory parameters.                                                                                    |
| <b>Anticoagulant medication</b>                |                 |                           |                    |                     |                                                                                          |                                                                  |                                                     |                                                                                                                                                                |                                                                                                                                                                                                               |
| Roughead, 2011 [28]                            | Australia       | 16,320/816                | Home               | Pharmacist          | Home-dwelling elderly using warfarin                                                     | Medication review with interview and follow-up with GP (2a)      | Retrospective cohort study                          | Economic: Number of hospital admissions related to bleeding                                                                                                    | Economic: A 79% reduction in likelihood of hospitalisation related to bleeding for the period of 2-6 months after receiving a medication review. No difference for the time before two months or 6-12 months. |
| Stafford, 2011 [29]                            | Australia       | 128/108                   | Home               | Pharmacist          | Adult users of warfarin                                                                  | Medication review with 2-3 follow-ups (2a)                       | Prospective, non-randomised controlled cohort study | Clinical: Combined incidence of major and minor hemorrhagic events in the 90 days post discharge<br>Economic: Warfarin-related hospital readmissions and death | Clinical: Significant reduction in the number of hemorrhagic events in the 90 days post discharge (5.3% vs. 14.7%, P=0.01).<br>Economic: No difference in readmission or death.                               |

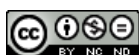

| Author, year                              | Country   | N (Control/ intervention) | Setting            | Health professional | Age group, residency                                       | Medication review model*                                                           | Type of study                                                                                                                   | Outcome measures                                                                                                   | Conclusions                                                                                                                                                      |
|-------------------------------------------|-----------|---------------------------|--------------------|---------------------|------------------------------------------------------------|------------------------------------------------------------------------------------|---------------------------------------------------------------------------------------------------------------------------------|--------------------------------------------------------------------------------------------------------------------|------------------------------------------------------------------------------------------------------------------------------------------------------------------|
| <b>Blood pressure lowering medication</b> |           |                           |                    |                     |                                                            |                                                                                    |                                                                                                                                 |                                                                                                                    |                                                                                                                                                                  |
| Wittayanukorn, 2013 [30]                  | USA       | 62/63                     | Health clinic      | Pharmacist          | Adult, home-dwelling with cardiovascular disease (CVD)     | Medication Therapy Management (MTM) with interview and at least one follow-up (2a) | Two Pre- and post-retrospective designs: (1) a cohort study with comparison groups and (2) a cohort study with group comparison | Economic: Direct cost per patient<br>Clinical: Blood pressure                                                      | Economic: Significantly lower costs for the MTM group (-\$359.3±219.2, P<0.0001). Clinical: Significant improvement of blood pressure.                           |
| Planas, 2007 [31]                         | USA       | 20/32                     | Community pharmacy | Pharmacist          | Home-dwelling adults with diabetes and high blood pressure | MTM with interview and follow-up every month for 9 months (2a)                     | RCT                                                                                                                             | Clinical: Systolic blood pressure, percent blood pressure (>130/80 mmHg) and antihypertensive medication adherence | Clinical: Significantly improved systolic blood pressure and percentage >130/80 mmHg [95% CI 7.45-32.66, P=0.003].<br>A non-significant improvement of adherence |
| <b>Antidiabetic medication</b>            |           |                           |                    |                     |                                                            |                                                                                    |                                                                                                                                 |                                                                                                                    |                                                                                                                                                                  |
| Skinner, 2015 [32]                        | USA       | 50/50                     | Health clinic      | Pharmacist          | Home-dwelling adults with suboptimal control of diabetes   | MTM with interview and no structured follow-up (2a)                                | Retrospective, case-control study                                                                                               | Clinical: HbA1c, blood pressure, lipids and creatinine<br>Humanistic: Adherence                                    | Clinical: Significant improvement of HbA1c and adherence (P<0.01). No difference for other parameters.                                                           |
| Brummel, 2013 [33]                        | USA       | 103/121                   | Health clinic      | Pharmacist          | Home-dwelling adults with diabetes                         | MTM with interview and follow-up (3)                                               | Retrospective review                                                                                                            | Clinical: Number of DRP and achievement of goals for treatment (HbA1c, LDL, blood pressure and others)             | Clinical: Significant improvement of HbA1c [95 % CI 1.78-14.68, P<0.0025] and LDL [95% CI 1.67-33.18, P=0.0085]                                                  |
| Krass, 2005 [34]                          | Australia | 82/106                    | Community pharmacy | Pharmacist          | Home-dwelling adults with type 2 diabetes                  | Medication review with interview and follow-up every month for nine months (2a)    | Cohort study                                                                                                                    | Clinical: Change in medication regime<br>Humanistic: Adherence                                                     | Clinical: Significant improvement of adherence (BMQ-score, P<0.001). Significant reduction in prescribed medication (P=0.02).                                    |



| Author, year                                  | Country         | N (Control/ intervention) | Setting                                      | Health professional | Age group, residency                                                                       | Medication review model*                                              | Type of study                                                                | Outcome measures                                                                                                                                                           | Conclusions                                                                                                                                                                                                                         |
|-----------------------------------------------|-----------------|---------------------------|----------------------------------------------|---------------------|--------------------------------------------------------------------------------------------|-----------------------------------------------------------------------|------------------------------------------------------------------------------|----------------------------------------------------------------------------------------------------------------------------------------------------------------------------|-------------------------------------------------------------------------------------------------------------------------------------------------------------------------------------------------------------------------------------|
| <i>Medication against Parkinson's disease</i> |                 |                           |                                              |                     |                                                                                            |                                                                       |                                                                              |                                                                                                                                                                            |                                                                                                                                                                                                                                     |
| Foppa, 2016 [35]                              | Brazil          | 55                        | Community pharmacy                           | Pharmacist          | Home-dwelling Parkinson's patients                                                         | MTM with interview and five follow-ups (2a)                           | Quasi-experimental, uncontrolled before and after study                      | Clinical: Number of solved DRP, motor and non-motor symptoms Humanistic: HRQoL, adherence                                                                                  | Clinical: Significant reduction in DRP (P<0.001). No difference for motor symptoms and a significant reduction in non-motor symptoms. Humanistic: Improvement of HRQoL and significant improvement of adherence.                    |
| Henrichsmann, 2016[36]                        | Germany         | 90                        | Community pharmacy                           | Pharmacist          | Home-dwelling Parkinson's patients                                                         | MTM with interview and one follow-up (2a)                             | Longitudinal intervention study                                              | Clinical: number of DRP and changes to Unified Parkinson's disease rating scale (UPDRS) and Movement Disorder Society Unified Parkinson's disease ratings scale (MDS-URDS) | Clinical: 115 clinically relevant DRP identified. Significantly improvement of UPDRS and MDS-URDS                                                                                                                                   |
| <i>Risk patients</i>                          |                 |                           |                                              |                     |                                                                                            |                                                                       |                                                                              |                                                                                                                                                                            |                                                                                                                                                                                                                                     |
| <i>Frail patients</i>                         |                 |                           |                                              |                     |                                                                                            |                                                                       |                                                                              |                                                                                                                                                                            |                                                                                                                                                                                                                                     |
| Morre, 2013 [38]                              | USA             | 2250/2250                 | PBM firm (pharmacy benefit managers company) | Pharmacist          | Home-dwelling adults considered high-risk patients based on the number of insurance claims | MTM with interview and at least two follow-ups over the phone (3)     | Retrospective cohort study using propensity score matching for control group | Economic: Total health care costs and contacts to health care Humanistic: Adherence                                                                                        | Economic: Significant reduction in health care costs for intervention group (P<0.048) and number of visits to GP and hospital (P<0.001). Humanistic: Adherence improved for some medication groups.                                 |
| Zermansky, 2006 [41]                          | UK              | 330/331                   | Care home                                    | Pharmacist          | Frail care home residents                                                                  | Medication review with patient and carer. No structured follow-up (3) | RCT                                                                          | Clinical: Changes in number of medications, changes in medication, number of falls, deaths, hospital admissions and GP visits Economic: Cost of medication for 28 days     | Clinical: Significant reduction in number of falls [0.95 % CI 0.49-0.70, P<0.00001] and significantly more changes to medication [0.95 % CI 1.21-1.48, P<0.0001]. Economic: No differences in costs, re-admission, or visits to GP. |
| Leendertse, 2013 [42]                         | The Netherlands | 310/364                   | Unclear                                      | Pharmacist          | Home dwelling 65+ years using high risk medication                                         | Medication review with interview and at least two follow-ups (2a)     | Non-randomised controlled cohort study                                       | Economic: Hospital admission, survival Clinical: Adverse drug events Humanistic: HRQoL                                                                                     | Economic: No significant differences in hospital admissions. Clinical: No significant differences Humanistic: No significant differences                                                                                            |



| Author, year                                      | Country         | N (Control/ intervention) | Setting                    | Health professional      | Age group, residency                                            | Medication review model*                                                            | Type of study                                       | Outcome measures                                                                                                                                                               | Conclusions                                                                                                                                         |
|---------------------------------------------------|-----------------|---------------------------|----------------------------|--------------------------|-----------------------------------------------------------------|-------------------------------------------------------------------------------------|-----------------------------------------------------|--------------------------------------------------------------------------------------------------------------------------------------------------------------------------------|-----------------------------------------------------------------------------------------------------------------------------------------------------|
| Verdoorn, 2019[43]                                | The Netherlands | 314/315                   | Community pharmacy         | Community pharmacist     | Home-dwelling 70+ years using 7+ medicines                      | Medication review with interview and at least two follow-ups (3)                    | RCT                                                 | Humanistic: HRQoL<br>Clinical: Number of health problems                                                                                                                       | Humanistic: No significant differences<br>Clinical: No significant differences                                                                      |
| Wouters, 2017 [37]                                | The Netherlands | 193/223                   | Care home                  | Pharmacist and physician | Frail elderly living in care homes                              | Medication review based on questionnaire from patient. No structured follow-up (2b) | Cluster RCT                                         | Clinical:<br>Deprescribing<br>Economic: Visits and consultations with other health care professionals<br>Humanistic:<br>Cognitive impairment, neuropsychiatric symptoms, HRQoL | Clinical: A greater proportion of intervention group had at least one drug deprescribed.<br>Economic: No difference<br>Humanistic: No differences.  |
| Lenaghan, 2007 [40]                               | UK              | 67/69                     | Home                       | Pharmacist               | Elderly, home-dwelling at risk                                  | Home medication review and one follow-up (2a)                                       | RCT                                                 | Economic: Non-elective hospital admissions, admitted to care home, death<br>Clinical:<br>Number of prescribed medications<br>Humanistic:<br>HRQoL                              | Economic: no reduction in number of hospital admission<br>Clinical: Significant reduction in prescribed medication [0.95% CI -1.66 - -0.08, P=0.03] |
| Verrue et al., 2012 [39]                          | Belgium         | 154/230                   | Care home                  | Clinical pharmacist      | Care home residents                                             | Medication review without interview and no structured follow-up (2b)                | Non-randomised, controlled study                    | Clinical:<br>Overuse, underuse and misuse of medication                                                                                                                        | Clinical: Non-significant improvement of prescribing                                                                                                |
| <i>Patients recently discharged from hospital</i> |                 |                           |                            |                          |                                                                 |                                                                                     |                                                     |                                                                                                                                                                                |                                                                                                                                                     |
| Lapointe-Shaw, 2019 [44]                          | Canada          | 67,163/ 67,163            | Home or community pharmacy | Pharmacist               | Home-dwelling elderly                                           | MedsCheck with interview and no structured follow-up (2a)                           | Retrospective propensity score-matched cohort study | Economic: Time to death or readmission to hospital                                                                                                                             | Economic: Significant reduction in risk of 30 days to death or readmission [0.95% CI 0.95-1.00, P=0.02]                                             |
| Shaya, 2015 [45]                                  | USA             | 73/28                     | Endocrinology practice     | Pharmacist               | Home-dwelling diabetic adults recently discharged from hospital | MTM with interview and three follow-ups (3)                                         | Non-randomised with historical control group        | Economic: Hospital readmission at 30 days post discharge, use of health services and services related to DRP                                                                   | Economic: No differences for economic outcomes                                                                                                      |



| Author, year                        | Country        | N (Control/ intervention) | Setting              | Health professional | Age group, residency                                                                                                | Medication review model*                                                                              | Type of study                                                      | Outcome measures                                                                                                                               | Conclusions                                                                                                                                                                                                                                                                                   |
|-------------------------------------|----------------|---------------------------|----------------------|---------------------|---------------------------------------------------------------------------------------------------------------------|-------------------------------------------------------------------------------------------------------|--------------------------------------------------------------------|------------------------------------------------------------------------------------------------------------------------------------------------|-----------------------------------------------------------------------------------------------------------------------------------------------------------------------------------------------------------------------------------------------------------------------------------------------|
| Holland, 2005[46]                   | United Kingdom | 426/429                   | Home                 | Pharmacist          | Hospitalized patients intended to be discharged                                                                     | Medication review after discharge and one follow-up after 6-8 weeks                                   | RCT                                                                | Economic: Hospital emergency readmission, death, admission to residential or nursing home<br>Humanistic: HRQoL                                 | Economic: Significant more readmissions in the intervention group [0.95% CI 1.07-1.58, P=0.009]. Fewer deaths in the intervention group and more patients were admitted to homes in the intervention group.<br>Humanistic: No significant difference between intervention and control groups. |
| <i>Patients with multimorbidity</i> |                |                           |                      |                     |                                                                                                                     |                                                                                                       |                                                                    |                                                                                                                                                |                                                                                                                                                                                                                                                                                               |
| Sorensen, 2004 [49]                 | Australia      | 223/177                   | Home                 | Pharmacist/<br>GP   | Adult, high-risk patients with comorbidity (3)                                                                      | Medication review with interview followed by GP/pharmacist meeting and at least one follow-up with GP | Randomised, controlled effectiveness study                         | Clinical: Number of DRP<br>Economic: Medication and health-related costs<br>Humanistic: HRQoL                                                  | Clinical: No difference<br>Economic: No differences<br>Humanistic: No difference                                                                                                                                                                                                              |
| Ferries, 2019 [47]                  | USA            | 64,801/5692               | Humana, US (Company) | N/A                 | Home-dwelling, adult, comorbid patients with diabetes, CVD, high blood pressure, dyslipidaemia or osteoporosis (2a) | Comprehensive Medication Review (CMR) and Targeted Medication Review (TMR). No described follow-up.   | Retrospective cohort study, propensity score-matched control group | Economic: Number of hospital admissions and visits to emergency department<br>Humanistic: Adherence                                            | Economic: Significant reduction in acute admissions to hospital and visits to emergency department.<br>Humanistic: Improved adherence for medication for diabetes, dyslipidaemia and high blood pressure.                                                                                     |
| Roughead, 2009 [50]                 | Australia      | 5444/273                  | Home                 | Pharmacist          | Elderly, comorbid heart patients (2a)                                                                               | Medication review with interview and one follow-up with GP                                            | Retrospective cohort study                                         | Economic: Time until next admission to hospital<br>Humanistic: Adherence (Medication Possession ratio and Daily Polypharmacy Possession Ratio) | Economic: A significant reduction of 45% of admissions to hospital due to reduction in heart attacks [0.95 % CI 0.39-0.77]<br>Humanistic: No difference                                                                                                                                       |
| Messerli, 2016[52]                  | Switzerland    | 232/218                   | Community pharmacy   | Pharmacist          | Home-dwelling, polypharmacy adults (2a)                                                                             | Medication review with one follow-up                                                                  | RCT                                                                |                                                                                                                                                |                                                                                                                                                                                                                                                                                               |
| Messerli, 2018 [51]                 | Switzerland    | 232/218                   | Community pharmacy   | Pharmacist          | Home-dwelling, polypharmacy adults (2a)                                                                             | Medication review with interview and one follow-up                                                    | RCT                                                                | Humanistic: Patients' knowledge, patient satisfaction and patient acceptance                                                                   | Humanistic: Increased knowledge and confidence using medication. Patients found the medication review helpful.                                                                                                                                                                                |



| Author, year            | Country | N (Control/ intervention) | Setting            | Health professional | Age group, residency                                      | Medication review model*                             | Type of study                                             | Outcome measures                                                                                                                                         | Conclusions                                                                                                                                                                                          |
|-------------------------|---------|---------------------------|--------------------|---------------------|-----------------------------------------------------------|------------------------------------------------------|-----------------------------------------------------------|----------------------------------------------------------------------------------------------------------------------------------------------------------|------------------------------------------------------------------------------------------------------------------------------------------------------------------------------------------------------|
| Isetts, 2007 [48]       | USA     | 126/128                   | Health clinic      | Pharmacist          | Home-dwelling adults (2a)                                 | MTM with interview and at least one follow-up        | Prospective cohort study with retrospective control group | Clinical: Number of solved DRP, meeting measures for Health care Effectiveness Data and Information Set (HEDIS) Economic: Health-related costs           | Clinical: 2.2 DRP were solved per patient in the intervention group. HEDIS measures improved. Economic: Health-related costs reduced by 31,5% for the intervention group.                            |
| Jodar-Sanchez, 2015 [1] | Spain   | 715/688                   | Community pharmacy | Pharmacist          | Home-dwelling elderly using five or more medications (2a) | Medication review with interview and five follow-ups | Cluster RCT                                               | Clinical: DRP, number of drugs Economic: Number of admissions to hospital and visits to the emergency department and health care costs Humanistic: HRQoL | Clinical: Significant reduction of admissions to hospital and visits to the emergency department. Economic: Significant reduction in health care costs Humanistic: Significant improvement of HRQoL. |

\*Medication review model according to PCNE definition



Supplement: pharmpract-18-1976-suppl.pdf [file pharmpract-18-1976-suppl.pdf]
